# Supplementary material for: Enzymatic hydrolysis followed by gas chromatography-mass spectroscopy for determination of glycosides in tobacco and method optimization by response surface methodology
Source: Royal Society of Chemistry journal article supplement (doi:10.1039/c4ay01056f), 2014-06-30

Table 1-S Design matrix and the response of the PBD

| Run No | A  | B  | C  | D  | E  | F  | Relative response |
|--------|----|----|----|----|----|----|-------------------|
| 1      | -1 | -1 | -1 | 1  | -1 | 1  | 13.895            |
| 2      | -1 | -1 | 1  | -1 | 1  | 1  | 21.456            |
| 3      | 1  | -1 | 1  | 1  | -1 | 1  | 15.018            |
| 4      | -1 | 1  | -1 | 1  | 1  | -1 | 17.947            |
| 5      | 1  | -1 | 1  | 1  | 1  | -1 | 15.567            |
| 6      | -1 | -1 | -1 | -1 | -1 | -1 | 18.231            |
| 7      | 1  | 1  | -1 | -1 | -1 | 1  | 20.378            |
| 8      | -1 | 1  | 1  | -1 | 1  | 1  | 24.078            |
| 9      | -1 | 1  | 1  | 1  | -1 | -1 | 17.089            |
| 10     | 1  | -1 | -1 | -1 | 1  | -1 | 16.456            |
| 11     | 1  | 1  | 1  | -1 | -1 | -1 | 21.127            |
| 12     | 1  | 1  | -1 | 1  | 1  | 1  | 15.765            |

Table 2-S Design matrix and the response of the CCD

| Run No | Blocks  | A   | B  | C | D  | Relative response | Comments               |
|--------|---------|-----|----|---|----|-------------------|------------------------|
| 1      | Block 1 | 5.6 | 48 | 2 | 38 | 23.005            | Center- full factorial |
| 2      | Block 1 | 6.2 | 36 | 1 | 32 | 15.018            | Full factorial         |
| 3      | Block 1 | 6.2 | 36 | 3 | 44 | 17.174            | Full factorial         |
| 4      | Block 1 | 5   | 36 | 3 | 32 | 19.078            | Full factorial         |
| 5      | Block 1 | 5   | 60 | 3 | 44 | 18.067            | Full factorial         |
| 6      | Block 1 | 5   | 60 | 1 | 32 | 20.988            | Full factorial         |
| 7      | Block 1 | 5.6 | 48 | 2 | 38 | 24.356            | Center- full factorial |
| 8      | Block 1 | 6.2 | 60 | 3 | 32 | 20.589            | Full factorial         |
| 9      | Block 1 | 6.2 | 60 | 1 | 44 | 19.015            | Full factorial         |
| 10     | Block 1 | 5   | 36 | 1 | 44 | 16.901            | Full factorial         |
| 11     | Block 2 | 6.2 | 36 | 3 | 32 | 18.349            | Full factorial         |
| 12     | Block 2 | 5   | 60 | 3 | 32 | 21.389            | Full factorial         |
| 13     | Block 2 | 5   | 36 | 1 | 32 | 18.578            | Full factorial         |
| 14     | Block 2 | 5   | 60 | 1 | 44 | 19.367            | Full factorial         |
| 15     | Block 2 | 5.6 | 48 | 2 | 38 | 23.045            | Center- full factorial |
| 16     | Block 2 | 6.2 | 36 | 1 | 44 | 16.091            | Full factorial         |
| 17     | Block 2 | 6.2 | 60 | 1 | 32 | 20.234            | Full factorial         |
| 18     | Block 2 | 6.2 | 60 | 3 | 44 | 19.089            | Full factorial         |
| 19     | Block 2 | 5.6 | 48 | 2 | 38 | 23.609            | Center- full factorial |
| 20     | Block 2 | 5   | 36 | 3 | 44 | 17.578            | Full factorial         |
| 21     | Block 3 | 5.6 | 48 | 2 | 50 | 14.267            | Axial                  |
| 22     | Block 3 | 5.6 | 48 | 2 | 38 | 23.534            | Center-axial           |
| 23     | Block 3 | 4.4 | 48 | 2 | 38 | 18.089            | Axial                  |
| 24     | Block 3 | 5.6 | 24 | 2 | 38 | 20.191            | Axial                  |
| 25     | Block 3 | 5.6 | 48 | 0 | 38 | 19.012            | Axial                  |
| 26     | Block 3 | 5.6 | 48 | 4 | 38 | 22.067            | Axial                  |

|    |         |     |    |   |    |        |              |
|----|---------|-----|----|---|----|--------|--------------|
| 27 | Block 3 | 5.6 | 48 | 2 | 26 | 15.987 | Axial        |
| 28 | Block 3 | 6.8 | 48 | 2 | 38 | 18.712 | Axial        |
| 29 | Block 3 | 5.6 | 72 | 2 | 38 | 24.005 | Axial        |
| 30 | Block 3 | 5.6 | 48 | 2 | 38 | 23.212 | Center-axial |

Table 3-S Analysis of variance for the fitted models in PBD

| Source   | SS <sup>a</sup> | d.f. <sup>b</sup> | MS <sup>c</sup> | F-value | p-value |    |
|----------|-----------------|-------------------|-----------------|---------|---------|----|
| Model    | 100.17          | 6                 | 16.70           | 20.93   | 0.0021  | S  |
| A        | 5.86            | 1                 | 5.86            | 7.34    | 0.0423  | S  |
| B        | 20.70           | 1                 | 20.70           | 25.95   | 0.0038  | S  |
| C        | 11.34           | 1                 | 11.33           | 14.20   | 0.0130  | S  |
| D        | 58.28           | 1                 | 58.28           | 73.05   | 0.0004  | S  |
| E        | 2.55            | 1                 | 2.55            | 3.20    | 0.1339  | NS |
| F        | 1.45            | 1                 | 1.45            | 1.82    | 0.2353  | NS |
| Residual | 3.99            | 5                 | 0.80            |         |         |    |
| Total    | 104.16          | 11                |                 |         |         |    |

<sup>a</sup> SS: Sum of square; <sup>b</sup> d.f.: Degree of freedom; <sup>c</sup> MS: Mean square

Table 4-S The significance of each variable effect was showed by F and p values.

|                     | Factor         | SS <sup>a</sup> | d.f. <sup>b</sup> | MS <sup>c</sup> | F-value | p-value  |    |
|---------------------|----------------|-----------------|-------------------|-----------------|---------|----------|----|
| Linear effects      | A              | 1.10            | 1                 | 1.10            | 2.44    | 0.1424   | NS |
|                     | B              | 31.74           | 1                 | 31.74           | 70.26   | < 0.0001 | S  |
|                     | C              | 5.26            | 1                 | 5.26            | 11.64   | 0.0046   | S  |
|                     | D              | 8.62            | 1                 | 8.62            | 19.08   | 0.0008   | S  |
| Interaction effects | AB             | 1.33            | 1                 | 1.33            | 2.95    | 0.1095   | NS |
|                     | AC             | 1.30            | 1                 | 1.30            | 2.88    | 0.1133   | NS |
|                     | AD             | 1.75            | 1                 | 1.75            | 3.89    | 0.0704   | NS |
|                     | BC             | 2.30            | 1                 | 2.30            | 5.08    | 0.0421   | S  |
|                     | BD             | 1.20            | 1                 | 1.20            | 2.66    | 0.1270   | NS |
|                     | CD             | 1.03            | 1                 | 1.03            | 2.27    | 0.1556   | NS |
| Quadratic effects   | A <sup>2</sup> | 49.21           | 1                 | 49.21           | 108.94  | < 0.0001 | S  |
|                     | B <sup>2</sup> | 4.73            | 1                 | 4.73            | 10.46   | 0.0065   | S  |
|                     | C <sup>2</sup> | 17.76           | 1                 | 17.76           | 39.32   | < 0.0001 | S  |
|                     | D <sup>2</sup> | 127.71          | 1                 | 127.71          | 282.74  | < 0.0001 | S  |

<sup>a</sup> SS: Sum of square; <sup>b</sup> d.f.: Degree of freedom; <sup>c</sup> MS: Mean square

Table 5-S The repeatability and linearity of the proposed method

| No                        | Aglycone compounds or m/z (Abundance) <sup>b</sup>                                                | Repeatability/% | Reproducibility/% | Linearity/r |
|---------------------------|---------------------------------------------------------------------------------------------------|-----------------|-------------------|-------------|
| <i>Aliphatic alcohols</i> |                                                                                                   |                 |                   |             |
| 1                         | 3-Methyl-butyl alcohol                                                                            | 8.1             | 9.5               | 0.995       |
| <i>Fatty acids</i>        |                                                                                                   |                 |                   |             |
| 2                         | 3-Methylbutanoic acid                                                                             | 13.1            | 14.2              | 0.989       |
| 3                         | 2-Methylbutanoic acid                                                                             | 11.6            | 11.8              | 0.991       |
| 4                         | 3-Methylpentanoic acid                                                                            | 12.7            | 15.7              | 0.980       |
| <i>Aromatic compounds</i> |                                                                                                   |                 |                   |             |
| 5                         | Benzaldehyde                                                                                      | 7.8             | 8.5               | 0.997       |
| 6                         | Benzyl alcohol                                                                                    | 4.1             | 5.3               | 0.999       |
| 7                         | Phenethyl alcohol                                                                                 | 3.2             | 4.8               | 0.993       |
| 8                         | p-Vinylguaiacol                                                                                   | 3.5             | 3.9               | 0.999       |
| 9                         | 2-Hydroxyphenylethanol                                                                            | 10.2            | 13.5              | 0.988       |
| 10                        | 4-Hydroxyphenylethanol (Tyrosol)                                                                  | 7.7             | 8.9               | 0.996       |
| 11                        | Homovanillyl alcohol                                                                              | 5.3             | 5.4               | 0.998       |
| <i>Cl3 Norisoprenoids</i> |                                                                                                   |                 |                   |             |
| 12                        | 3-Hydroxy- $\beta$ -damascone                                                                     | 8.5             | 9.3               | 0.993       |
| 13                        | 3-Hydroxy- $\beta$ -ionol                                                                         | 7.0             | 8.5               | 0.992       |
| 14                        | 3-Hydroxy-7,8-dehydro- $\beta$ -ionol                                                             | 3.6             | 4.9               | 0.995       |
| 15                        | 181(100);125(91);163(39);145(7)<br>95(38); 83(35); 105(13)                                        | 6.5             | 7.8               | 0.990       |
| 16                        | 3-Oxo- $\alpha$ -ionol                                                                            | 7.9             | 8.5               | 0.993       |
| 17                        | 3-Hydroxy-5,6-epoxy- $\beta$ -ionol                                                               | 6.5             | 6.7               | 0.996       |
| 18                        | Blumenol C                                                                                        | 6.2             | 7.1               | 0.993       |
| 19                        | 9-Hydroxymegastigma-4,6-dien-3-one 1<br>9-Hydroxymegastigma-4,6-dien-3-one 2                      | 5.3             | 6.2               | 0.995       |
| 20                        | Vomifoliol                                                                                        | 8.2             | 9.5               | 0.994       |
| <i>Terpenoids</i>         |                                                                                                   |                 |                   |             |
| 21                        | 2,6-Dimethyl-2,7-octadiene-1,6-diol                                                               | 7.3             | 8.9               | 0.993       |
| 22                        | 83(100);69(56);98(24);108(14);109(14); 55(49)                                                     | 8.5             | 9.1               | 0.990       |
| 23                        | 3 $\beta$ -Hydroxysolanascone                                                                     | 9.0             | 11.8              | 0.992       |
| 24                        | 256(3);241(11);223(7);181(21);163(11);153(27);<br>135(32);127(65);109(71);101(100);95(73); 81(72) | 8.9             | 10.1              | 0.991       |
| 25                        | Rishitin                                                                                          | 3.1             | 5.4               | 0.995       |
| 26                        | 256(3);241(13);223(17);181(31);163(16);153(20);<br>135(22);127(100);109(56);101(59);95(78);81(74) | 11.8            | 12.5              | 0.993       |
| 27                        | 3 $\beta$ -Hydroxysolavetivone                                                                    | 5.1             | 6.4               | 0.998       |
| <i>Polyphenols</i>        |                                                                                                   |                 |                   |             |
| 28                        | Scopoletin                                                                                        | 13.6            | 15.4              | 0.985       |

Fig. 1-S Response surfaces of  $\beta$ -Glucosidase concentration (mg/mL) and agitation speed (rpm) for PBD

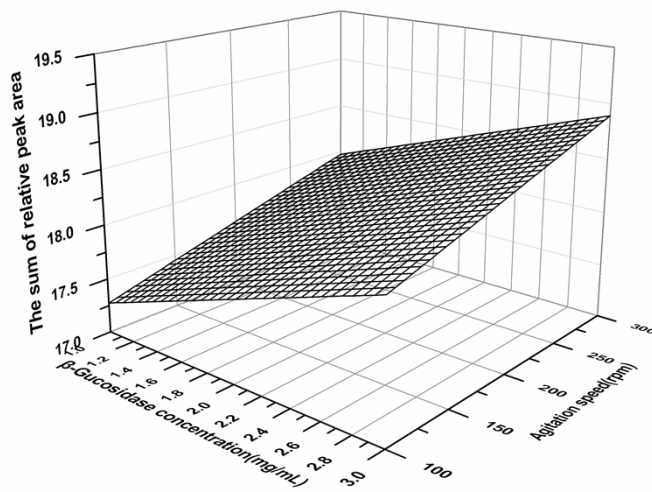

Supplement: c4ay01056f1.pdf [file c4ay01056f1.pdf]
